# Supplementary material for: Identification Of A New Role Of miR-199a-5p As Factor Implied In Neuronal Damage: Decreasing The Expression Of Its Target X-Linked Anti-Apoptotic Protein (XIAP) After SCI.
Source: Preprints.org preprint supplement (doi:10.20944/preprints202212.0020.v2), 2023-01-11
Supplement: Supplementary file 1 [file supplementary]

Archive with 6 entries (6 files):
- Suplementary tables.pdf
- __MACOSX/._Suplementary tables.pdf
- Supporting Information Figure 3 (new).pdf
- __MACOSX/._Supporting Information Figure 3 (new).pdf
- Supporting Information Figure 4C.pdf
- __MACOSX/._Supporting Information Figure 4C.pdf
