# Supplementary material for: Identification Of A New Role Of miR-199a-5p As Factor Implied In Neuronal Damage: Decreasing The Expression Of Its Target X-Linked Anti-Apoptotic Protein (XIAP) After SCI.
Source: Preprints.org preprint supplement (doi:10.20944/preprints202212.0020.v2), 2023-01-11
Supplement: Supplementary file 1 [file supplementary › Suplementary tables.pdf]

## Supplementary table 1

Data from previous RT-qPCRs studies of miR-199a-5p levels after SCI

|                                                                        |                   | Ctrl                 | 3 dpi                | 7 dpi           |
|------------------------------------------------------------------------|-------------------|----------------------|----------------------|-----------------|
| Yunta et al.,<br>2012                                                  | raw data $\pm$ SD | 7.83 $\pm$ 0.13      | 8.62 $\pm$ 0.49      | 8.89 $\pm$ 0.52 |
|                                                                        | statistics        |                      |                      | 1.5E-02         |
| Chen et al.,<br>2022                                                   | raw data $\pm$ SD | 1867.89 $\pm$ 262.17 | 1881.33 $\pm$ 552.14 |                 |
|                                                                        | statistics        |                      | 3.329                |                 |
| Liu et al., 2009<br>(Fold change =<br>log <sub>2</sub> (SCI/<br>SHAM)) | raw data $\pm$ SD | -                    | -                    | 1.02 $\pm$ 0.97 |
|                                                                        | statistics        |                      |                      | 2.2E-01         |

Yunta, Mónica, Manuel Nieto-Díaz, Francisco J. Esteban, Marcos Caballero-López, Rosa Navarro-Ruíz, David Reigada, D. Wolfgang Pita-Thomas, Ángela del Águila, Teresa Muñoz-Galdeano, and Rodrigo M. Maza. 2012. MicroRNA Dysregulation in the Spinal Cord following Traumatic Injury. *PLOS ONE* 7. Public Library of Science: e34534. <https://doi.org/10.1371/journal.pone.0034534>.

Chen, Jia-Nan, Yi-Ning Zhang, Li-Ge Tian, Ying Zhang, Xin-Yu Li, and Bin Ning. 2022. Down-regulating Circular RNA Prkcsb suppresses the inflammatory response after spinal cord injury. *Neural Regeneration Research* 17: 144–151. <https://doi.org/10.4103/1673-5374.314114>.

Liu, Nai-Kui, Xiao-Fei Wang, Qing-Bo Lu, and Xiao-Ming Xu. 2009. Altered microRNA expression following traumatic spinal cord injury. *Experimental Neurology* 219: 424–429. <https://doi.org/10.1016/j.expneurol.2009.06.015>.

# Supplementary table 2

**Table 1.** % of neurons expressing miR-199a-5p in dorsal and ventral horn in uninjured and after SCI.

| Neurons      | non-injured   | 3 dpi         | 7 dpi          |
|--------------|---------------|---------------|----------------|
| Dorsal horn  | 19.22 ± 3.13% | 21.53 ± 1.82% | 22.04 ± 10.94% |
| Ventral horn | 55,36 ± 3.61% | 62.74 ± 7.15% | 48.27 ± 4.38%  |

**Table 2.** Spatial distribution % of neural cells expressing miR-199a-5p in uninjured and after SCI.

| Neural cells                     | non-injured   | 3 dpi         | 7 dpi        |
|----------------------------------|---------------|---------------|--------------|
| Rostral (-0.5 mm from epicenter) | 27 ± 4.2%     | 39.86 ± 8.9   | 22.34 ± 5.3  |
| Caudal (+0.5 mm from epicenter)  | 24.01 ± 5.67% | 35.79 ± 19.72 | 14.68 ± 1.21 |
