# Supplementary material for: Identification Of A New Role Of miR-199a-5p As Factor Implied In Neuronal Damage: Decreasing The Expression Of Its Target X-Linked Anti-Apoptotic Protein (XIAP) After SCI.
Source: Preprints.org preprint supplement (doi:10.20944/preprints202212.0020.v2), 2023-01-11

# SUPPORTING INFORMATION FIGURE 4

- All images were taken **avoiding pixel saturation**, in an automated way, using ImageScanner III and LabScan v6.0 software (GE Healthcare Bio-Sciences AB) and band intensities were measured using ImageJ software version 1.53f51

Figure 4C in the text

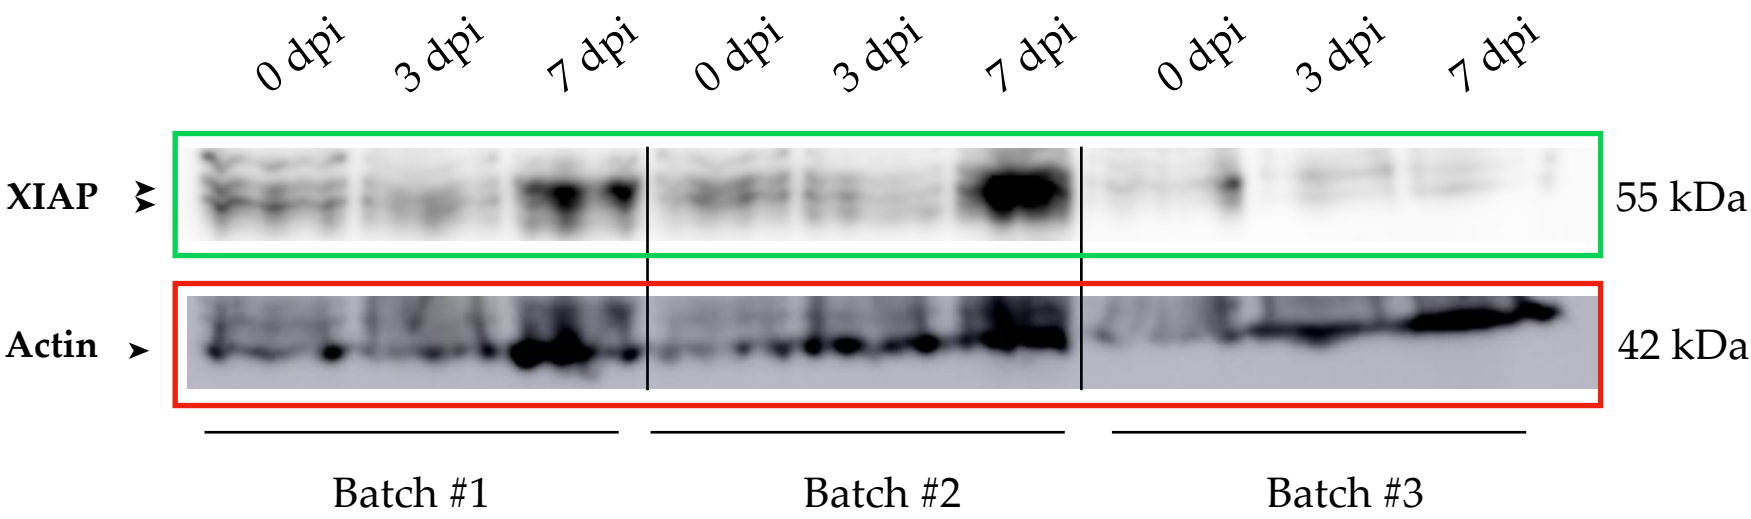

XIAP

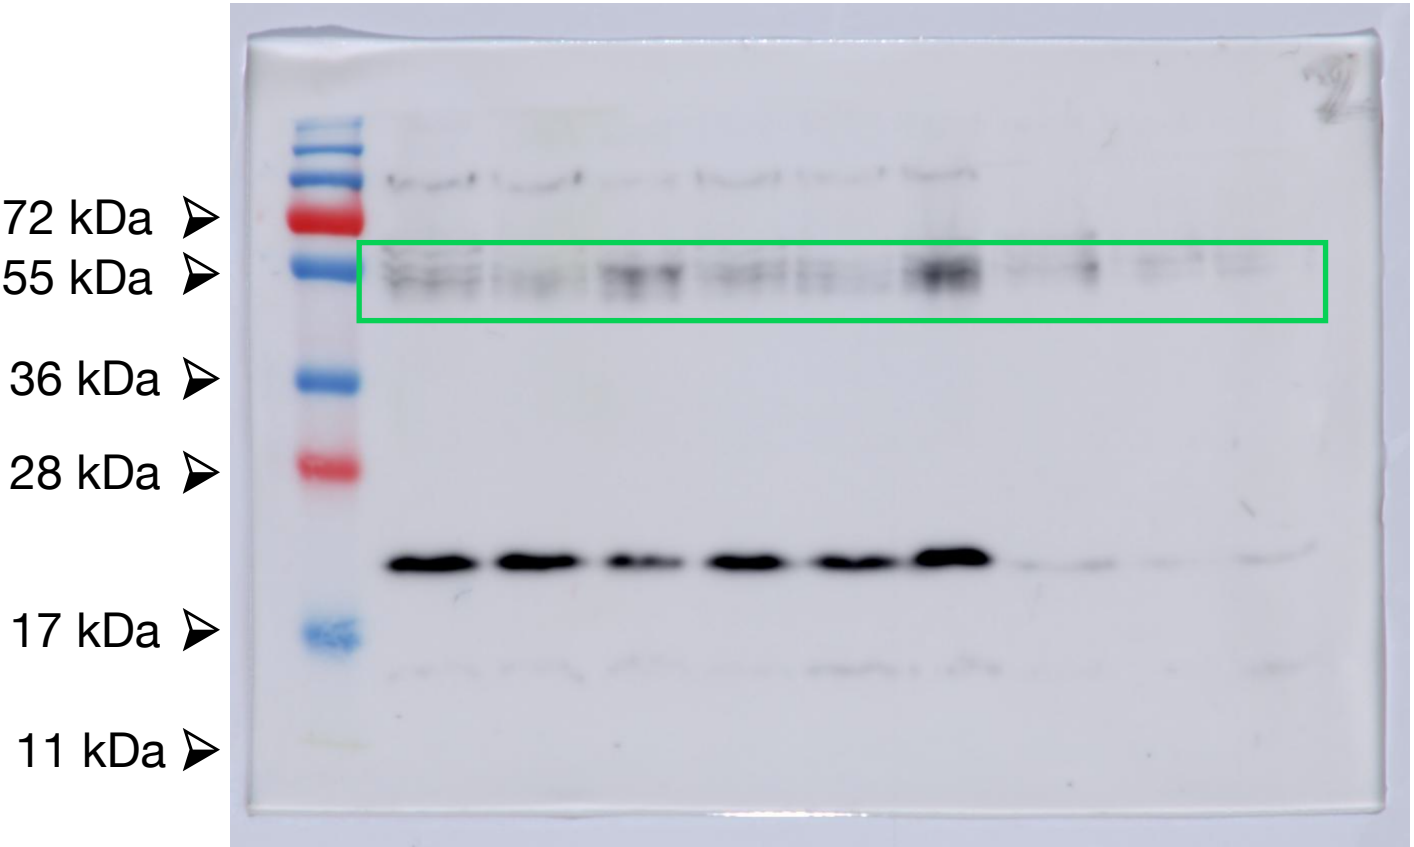

ACTIN

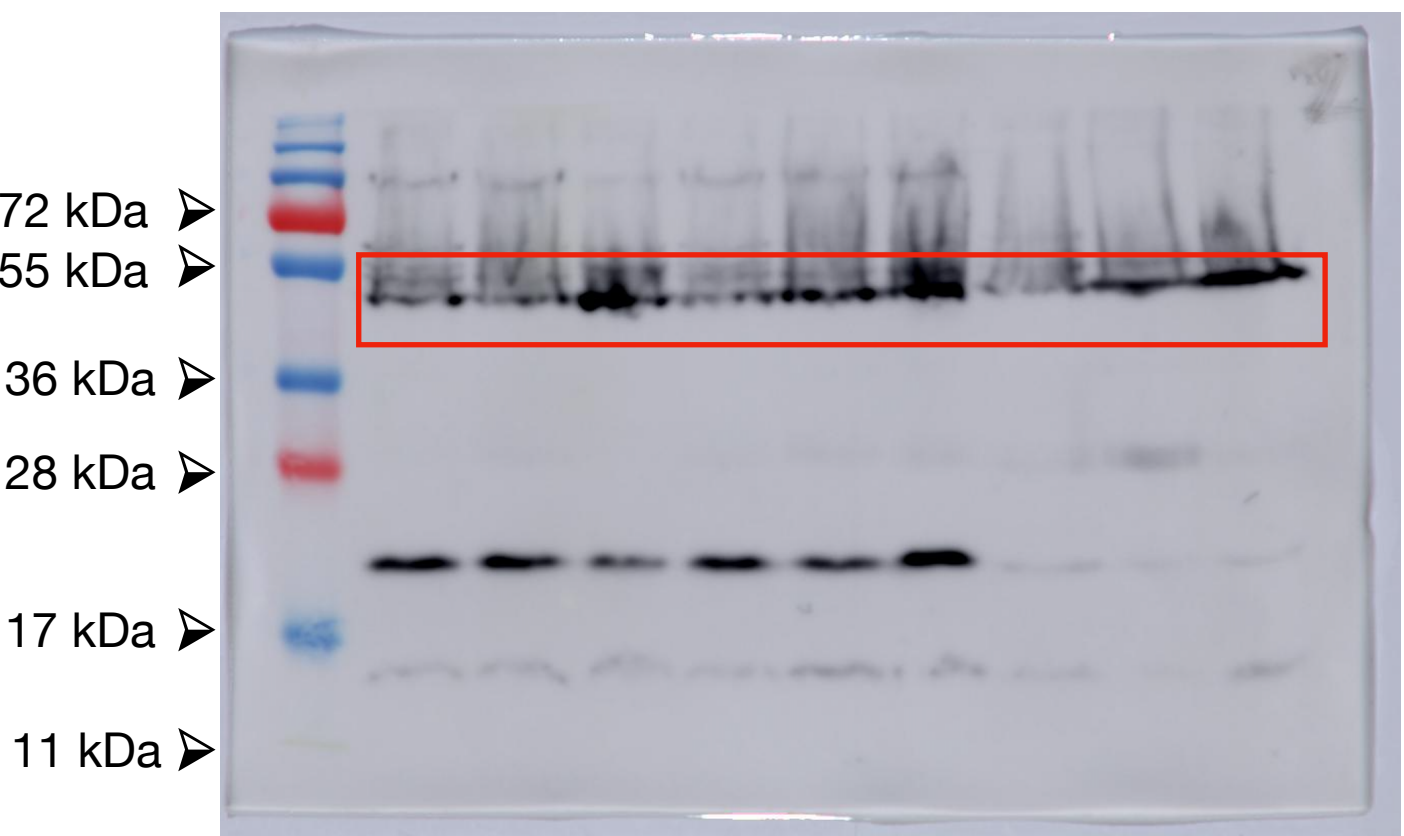

Supplement: Supplementary file 1 [file supplementary › Supporting Information Figure 4C.pdf]
